# Supplementary material for: Synthesis, Crystal Structure and Photoluminescent Properties of Novel 9-Cyano-Pyrrolo[1,2-a][1,10]Phenanthrolines
Source: MDPI journal article supplement (doi:10.3390/cryst14010067), 2024-01-07
Supplement: s1 [file s1]

# Synthesis, crystal structure and photoluminescent properties of novel 9-cyano-pyrrolo[1,2-*a*][1,10]phenanthrolines

Mihaela Cristea <sup>1</sup>, Mihai Răducă <sup>1,2,\*</sup>, Sergiu Shova <sup>3</sup>, Constantin Drăghici <sup>1</sup>, Vlad A. Neacșu <sup>2,4</sup>, Maria Maganu <sup>1</sup>, Loredana Albotă (Barbu) <sup>1</sup>, Denisa Dumitrescu <sup>5</sup> and Florea Dumitrascu <sup>1,\*</sup>

<sup>1</sup> "C. D. Nenițescu" Institute of Organic and Supramolecular Chemistry, Romanian Academy, 202 B Splaiul Independenței, 060023 Bucharest, Romania

<sup>2</sup> Inorganic Chemistry Department, Faculty of Chemistry, University of Bucharest, Regina Elisabeta Blvd., 4-12, 030018 Bucharest, Romania

<sup>3</sup> Department of Inorganic Polymers, Petru Poni Institute of Macromolecular Chemistry, Aleea Grigore Ghica Vodă nr. 41A, 700487 Iași, Romania

<sup>4</sup> Department of Chemistry, City University of Hong Kong, 83 Tat Chee Avenue, Kowloon Tong, 999077 Hong Kong

<sup>5</sup> Faculty of Pharmacy, Ovidius University Constanta, Campus Corp C, Str. Cpt. Av. Al. Serbanescu, 900470 Constanta, Romania

\* Correspondence: [fiidemn@gmail.com](mailto:fiidemn@gmail.com) (MR); [fdumitra@yahoo.com](mailto:fdumitra@yahoo.com) (FD).

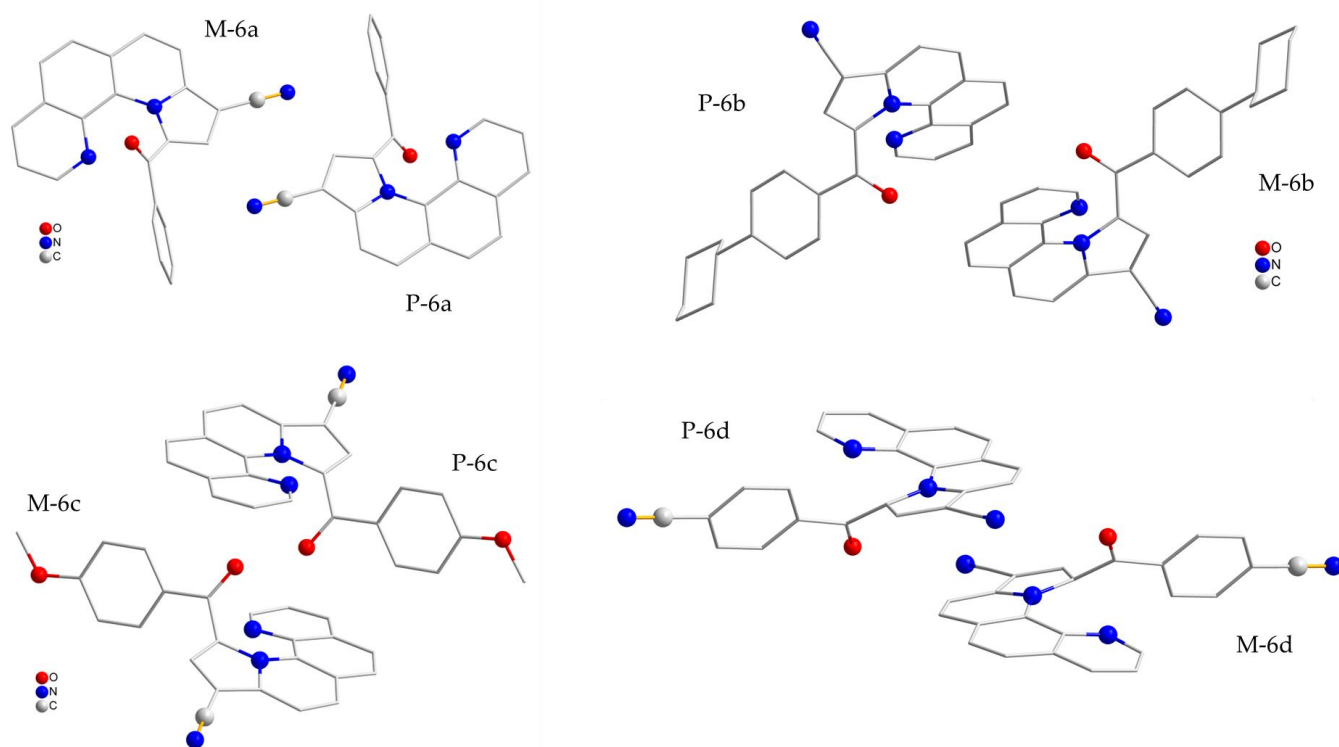

**Figure S1.** Perspective views of the crystal structures of two neighboring enantiomers (M and P) of compounds **6a-d**. Hydrogen atoms have been omitted in the representations.



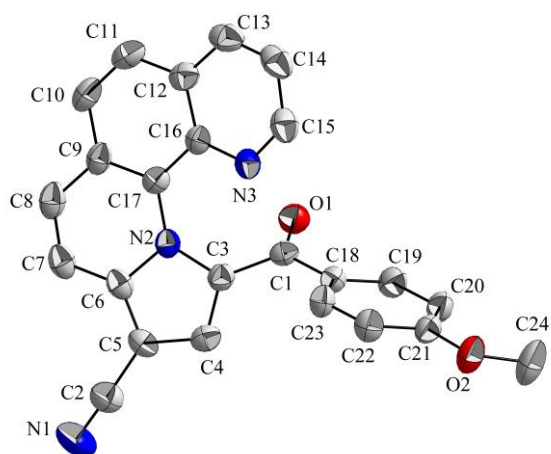

**6c**

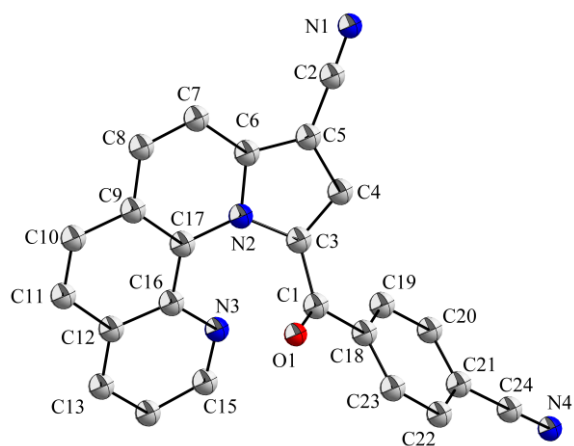

**6d**

**Figure S3.** Thermal ellipsoid representation of the molecular structure of compounds **6a-d**.
